# Supplementary material
Source: PubMed Central journal article supplement (PMC4734005)
Supplement: JVI.02711-15_zjv999091276so1.pdf [file JVI.02711-15_zjv999091276so1.pdf]

## Supplementary Figure Legends

**Supplemental Figure 1. Phylogenetic tree of SGA-derived *env* nucleotide sequences from the challenge stocks, and T/F Envs from vaccinated breakthrough and unvaccinated control infections.** A FASTA file of a Geneious v6 nucleotide alignment containing all T/F Env and challenge stock sequences was uploaded to the LANL Treemaker tool to generate a Neighbor-joining phylogenetic tree, which was annotated using the LANL Rainbow Tree tool. The distance model was Felsenstein F84, with gaps stripped, and equal site rates. T/F Env sequences from vaccinated animals appear in red, T/F Env sequences from control animals appear in blue, and sequences from the two challenge stocks appear in grey. The horizontal bar shows the scale of genetic distance.

**Supplemental Table 1. P values for all Fisher's exact tests.** P values are shown for all comparisons at positions 23 (I-V), 45 (A-T), 47 (K-R), and 70 (N-S), as calculated by Prism v6.0 for Mac. Due to multiple comparisons, a P value equal to or less than 0.01 was considered significant.

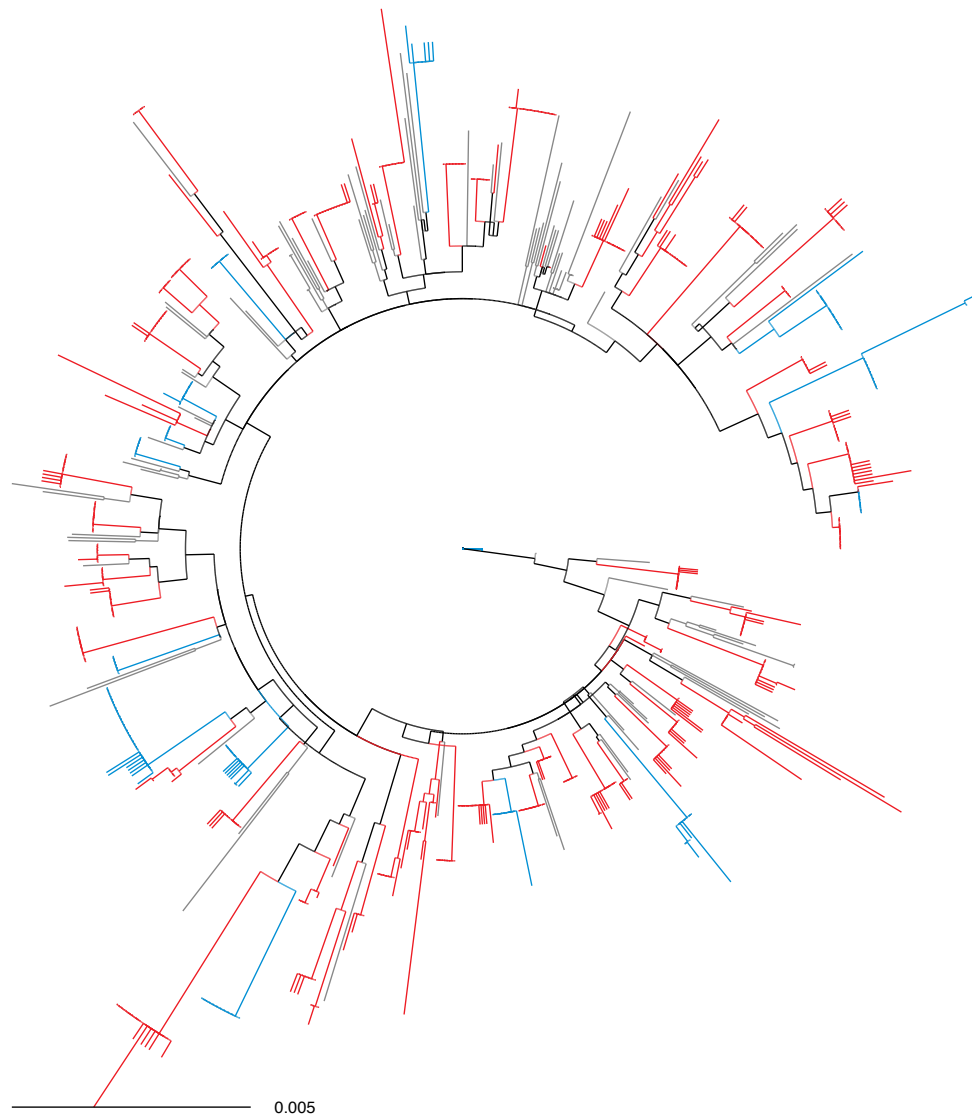

— Vaccinated

— Control

— Stock

| <b>Variable</b>               | <b>Group 1</b>          | <b>Group 2</b>           | <b>Position</b> | <b>Amino acids</b> | <b>P value</b> |
|-------------------------------|-------------------------|--------------------------|-----------------|--------------------|----------------|
| Transmission                  | Challenge Stock         | All T/F Envs             | 23              | I-V                | 0.017          |
|                               |                         |                          | 45              | A-T                | 0.002          |
|                               |                         |                          | 47              | K-R                | 0.0007         |
|                               |                         |                          | 70              | N-S                | 0.003          |
| Vaccination                   | Control T/F Envs        | Vaccinated T/F Envs      | 23              | I-V                | 0.743          |
|                               |                         |                          | 45              | A-T                | 0.336          |
|                               |                         |                          | 47              | K-R                | 0.506          |
|                               |                         |                          | 70              | N-S                | 1.000          |
| Challenge Route               | Intra-rectal T/F Envs   | Intra-vaginal T/F Envs   | 23              | I-V                | 0.776          |
|                               |                         |                          | 45              | A-T                | 0.580          |
|                               |                         |                          | 47              | K-R                | 0.561          |
|                               |                         |                          | 70              | N-S                | 0.592          |
| Challenge Number              | Infected at dose 1-6    | Infected at dose 7-12    | 23              | I-V                | 0.552          |
|                               |                         |                          | 45              | A-T                | 0.553          |
|                               |                         |                          | 47              | K-R                | 0.762          |
|                               |                         |                          | 70              | N-S                | 0.785          |
| TRIM5 $\alpha$ susceptibility | <sup>a</sup> Permissive | <sup>b</sup> Restrictive | 23              | I-V                | 0.783          |
|                               |                         |                          | 45              | A-T                | 0.577          |
|                               |                         |                          | 47              | K-R                | 0.777          |
|                               |                         |                          | 70              | N-S                | 1.000          |

<sup>a</sup>TFP/Q, Q/CYPA, Q/Q

<sup>b</sup>TFP/TFP, TFP/CYPA, CYPA/CYPA
